# Supplementary material
Source: PubMed Central journal article supplement (PMC5870880)
Supplement: NIHMS836166-supplement-appendix.pdf [file NIHMS836166-supplement-appendix.pdf]

## APPENDIX

### List of acronyms (in alphabetical order)

| Acronym                 | Definition                                                                                                              |
|-------------------------|-------------------------------------------------------------------------------------------------------------------------|
| <b>1M</b>               | Permanent first molar                                                                                                   |
| <b>DALY</b>             | Disability adjusted life year                                                                                           |
| <b>DALYW</b>            | Loss in health/well-being due child having toothache                                                                    |
| <b>Incidence</b>        | Annual probability a child has new first molar cavity                                                                   |
| <b>1MAR</b>             | Annual probability a sound, unsealed first molar gets a cavity. This value is used to estimate incidence and increment. |
| <b>Increment</b>        | Number of new first molar cavities per year per child                                                                   |
| <b>Prob (toothache)</b> | Probability a child with an untreated 1M cavity has a toothache                                                         |
| <b>Prob (untreated)</b> | Annual probability a child has a new 1M cavity that is not filled                                                       |
| <b>SSP</b>              | School sealant program                                                                                                  |

## I. METHODS

We estimated the net cost per averted disability-adjusted life year (DALY) over 4 years attributable to a school-based sealant program (SSP) sealing the permanent first molars (1Ms) soon after they erupt. Net cost equals SSP cost per child minus costs for fillings and associated parental time to take his/her child for dental care that were avoided because the child received SSP sealants. The cost per averted DALY per child equals:

$$\frac{\text{SSP Cost} - \text{Averted fillings and productivity losses}}{\text{Averted DALYS due to reduced toothaches attributable to SSP}}$$

Where:

- *Averted fillings and productivity losses* equals SSP effectiveness \* (1- prob(untreated)) \* [(increment \* filling cost) + (incidence \* productivity losses)]
- *Averted DALYS* equals SSP effectiveness \* incidence \* prob(untreated) \* prob(toothache) \* DALYW

In the following sections we describe the calculations to estimate how cavity and increment were estimated and how the other parameter values were derived.

## **I.A. Estimating Cavity Outcomes**

### **Estimating Permanent 1<sup>st</sup> Molar Annual Attack Rate**

We used de-identified data for children, aged 6 to 10 years, screened by SSPs in 14 states<sup>1</sup> between 2013 and 2014. Almost all programs served schools where greater than 50% of the students participated in the free/reduced meal program (eligibility based on family income  $\leq 185\%$  federal poverty level). Prior to placing sealants, SSP dentists or hygienists visually assessed each child's teeth. Increment was recorded during the assessment prior to sealant placement. We used data on increment for 36,753 children, aged 7 to 11 years, who were also assessed as having no sealants. To calculate the permanent first molar attack rate (1MAR), we used a published methodology (1). We first estimated the cumulative probability a 1M developed a cavity by summing increment by year of age and then dividing this sum by the number of 1M (number of children\*4). We subtracted the cumulative probability a 1M developed a cavity from 1 to estimate the cumulative probability a 1M did not develop a cavity, i.e., sound 1M. Assuming a constant attack rate and that 1M erupt at age 6 (2) the annual probability a 1M is sound can be obtained by taking the nth root of the cumulative probability of a sound 1M where n equals the age of the child minus 6. This annual probability a 1M is sound was subtracted from 1 to obtain the 1MAR for each age group. The weighted average 1MAR was 0.078 (Exhibit A1).

---

<sup>1</sup>Connecticut, Georgia, Iowa, Kansas, Louisiana, Maryland, Minnesota, Mississippi, New York, North Dakota, Rhode Island, South Carolina, West Virginia, and Wisconsin.

## Calculating 1M Cavity Incidence and Increment

A child has 4 first molars (1M), each of which could be sound (S) in the first year after eruption with probability 0.922 or have a cavity (C) with probability 0.078. Thus there are 16 possible events (Exhibit A2A) - 1 with no first molar cavities, 4 with 1 first molar cavity, 6 with 2 first molar cavities, 4 with 3 first molar cavities, and 1 with 4 first molar cavities. In time period 1, the probability of no first molar cavities is  $0.922^4$ , 1 first molar cavity is  $0.922^3 * 0.0728$ , 2 first molar cavities is  $0.922^2 * 0.078^2$ , 3 first molar cavities is  $0.922 * 0.078^3$ , and 4 first molar cavities is  $0.078^4$ . Multiplying these probabilities by the corresponding number of events provides us with the probabilities a child can have each of the following outcomes -- 0, 1, 2, 3, and 4 1M cavities. Multiplying the probability of each 1M cavity outcome by the number of cavities associated with that outcome provides us with the cumulative increment per child (Exhibit A2B). We can calculate the probabilities for year 2 in the same manner (Exhibit A2B) assuming the probability a 1M remains sound for 2 years is  $0.922^2$ . Incidence, the probability a child develops at least one 1M cavity, equals 1 minus the probability that all 1Ms remain sound.

The marginal or annual probabilities are defined by the difference in the cumulative probabilities (Exhibit A2C) for years  $n+1$  and year  $n$ . For example, the marginal probability of two 1M cavities in year 3 (0.075) equals the 3-year cumulative probability of two 1M cavities

(0.172) minus the 2-year cumulative probability of two 1M cavities (0.097). Finally, the 1M caries increment in year n equals the difference in the cumulative first molar caries increment from year n-1 to year n. Marginal incidence can be estimated in the same manner.

### **Assumptions**

Literature supporting the assumptions used to model caries increment and incidence are provided below:

1. All cavities in the permanent teeth occur in the pits and fissures of 1Ms. This is consistent with findings that about 90% of caries in the permanent teeth of children occur in the pits and fissures of posterior teeth (3) and that the only permanent posterior teeth likely to be erupted before age 10 are 1Ms (2).
2. All 1Ms erupt at age 6 (2).
3. The annual probability that a sound 1M develops a cavity is constant (1).
4. Sealants protect teeth against cavities for 4 years (4).

In the most recent Cochrane review of dental sealants that included studies placing sealants in schools and dental offices, a few studies had follow-up periods exceeding 4 years, but the majority stopped at 4 years or less (5). The Cochrane review only performed meta-analyses on studies with follow-up times of 4.5 years or less. The number of

studies that examined sealant effectiveness for follow-up times of 1, 2, 3, and 4 years were 6, 6, 7, and 5 studies, respectively, whereas for follow-up times of 5, 6, 7, and 9 years there was only one study per period<sup>1</sup>.

5. All four 1Ms are sealed by the SSP. This is consistent with studies estimating sealant loss rates (6, 7) and national data indicating that the average number of sealed 1Ms among children, age 6 to 11 years, with sealants is 3.23 (8).
6. All cavities occur at the beginning of the year. At this point 1M cavities can be filled or remain untreated for the duration of the year. This assumption was made for model tractability.
7. A child who develops 1M cavities and has them filled will visit the dentist once regardless of number of 1M cavities.
8. All untreated 1M cavities that are untreated in year  $i$  are filled year  $i+1$ .

### **I.B. Other Parameters**

***Probability new cavity remains untreated  $prob(untreated)$*** . We used published data from the 2007 National Health Interview Survey (NHIS) Supplement on parental report of whether their child had received dental treatment for a dental problem (9). This article classified dental problems as urgent (cavity, toothache, broken/missing tooth or

---

<sup>1</sup> See Comparison 1 in Data and Analysis Section.

restoration and bleeding gums) or non-urgent (stained, crooked, or loose teeth; dry mouth, jaw pain, mouth sores, and bad breath). We subtracted estimated probability of visiting the dentist among low-income (<100% federal poverty level) children for a reported urgent problem, 0.53 (standard error = 0.03) from 1 to estimate prob(untreated). We used dental visit for an urgent problem because most of these problems would be cavity-related.

***School-sealant effectiveness.*** We estimated sealant effectiveness at 1, 2, 3, and 4 years after placement assuming sealant effectiveness decreased each year after placement. We first converted odds ratios reported in the 2013 Cochrane review (5) to relative risk ratios using the following equation:  $RR=OR/(1-1MAR*(1+OR))$  where OR represents odds ratio and 1MAR equals 0.078. These relative risk ratios were adjusted upward (multiplied by 3.2) such that the overall 4-year effectiveness would be 50%, the estimate in the Task Force's effectiveness systematic review (4). The percentage reduction in incidence and increment due to sealants was 68.5%, 57.9%, 40.1% and 25.8% at 1, 2, 3, and 4-year follow-up.

We also estimated cost-effectiveness assuming sealants were effective up to 9 years. We used effectiveness estimates (relative risk or odds ratio converted to relative risk) for the 4 studies comparing sealant to no sealant with follow-up times of 5, 6, 7, and 9 years in the same Cochrane review. Effectiveness for these studies ranged from

55% to 65% with a mean value of 61%. For this analysis, we assumed a constant effectiveness of 61%.

Reduction in caries increment will depend on effectiveness and number of teeth sealed. For the base case we assumed that children received sealants on 4 first molars and in a sensitivity analysis set the number of sealed teeth to 3.

**Probability child with untreated cavity has toothache.** We used published estimates from national survey data on the ratio of percentage of 6 to 17-years-olds in 2007 with a reported toothache within the last six months (12.0% (10)) to the percentage of 5 to 19-year-olds in 2005 to 2008 with at least one untreated cavity (16.6% (11)) to estimate the probability that a child with at least 1 untreated cavity would experience pain, 0.721.

**Loss in health/well-being due to toothache.** To measure the loss in health/well-being resulting from having a toothache for one year, we used DALY data from the Global Burden of Disease. Because cavities rarely result in death, the Global Burden of Disease only included the effect of morbidity (toothache due to untreated cavities) on quality of life (12). This value was estimated to be 0.012.

**SSP cost.** We used the findings from the systematic review of economic analyses conducted for the Task Force (4). This review located four



studies conducted in the US with primary data for the cost of all resources used by nine SSPs ((13-16); one included study (14) reported cost estimates for six SSPs in five states (Exhibit A4). In one study (16), the reported time of 56 minutes to deliver 3.1 sealants to one child was double the 26 minutes reported on the Association of State and Territorial Dental Directors School Sealant program Best Practices website (17). Another study (15) reported sealing 11 teeth per child, which was more than twice the value (4 teeth) that SSPs typically target (all 1M in lower grades and 2<sup>nd</sup> molars in higher grades; (17)). Mean/median SSP cost per child was \$63.33/\$75.80, excluding these studies with outlier values and \$80.33 for all studies (Exhibit A4). For the base-case analysis, we estimated SSP cost excluding studies with outlier values and then used the mean for all studies in a sensitivity analysis.

**Cost per Filling.** To estimate the costs of resources used to fill a 1M cavity, we used information from the American Dental Association surveys on the average fee for pediatric dentists (18) and relative frequency of placing one and two surface fillings (19) applied on the permanent molars (Exhibit A5). Dental sealants can prevent cavities on the occlusal and buccal surfaces of 1M in the lower arch and occlusal and lingual surfaces on the upper arch. Fillings placed on the molars (posterior teeth) can be one and two-surface amalgam or composite. We estimated the average cost to fill a 1M to be \$173.98<sup>1</sup>

---

<sup>1</sup> Fees from 2013 were converted to 2014\$.

(Exhibit A5). Existing guidance recommends using average private reimbursements instead of public insurance reimbursements (20). To be conservative we searched for information on the percentage of private fees that are reimbursed by insurance companies based on the reasoning that insurance companies may be able to negotiate reimbursements to that which would prevail if dental markets were perfectly competitive. We used data from the Fair Health calculator (19) to estimate the percent of total charges that insurance companies reimburse (the remaining costs being out of pocket for the patient). We randomly sampled the total cost and portion that private insurance would reimburse for 50 US zip codes, 25 of which were from cities in the top 40 in population, for amalgams and posterior composite fillings. Regardless of dental procedure, information from this website indicates that insurance companies reimbursed dentists for 80% of their charges [95%CI: 0.77, 0.83]. We therefore estimated the cost of resources to place a filling to be \$139.18 ( $=0.80*\$173.98$ ). In a sensitivity analysis we calculated cost-effectiveness using the most conservative estimate of resources to fill a cavity - assuming only single-surface fillings and using Medicaid fees for amalgam and composite fillings from the 14 states that provided us with their SSP screening data. This value was \$64.17.

**Productivity losses.** We assumed that any child with new 1M caries would visit the dentist only once to receive necessary fillings

regardless of the number of 1M fillings. Thus productivity losses would be multiplied by incidence not increment. We estimated the value of lost productivity associated with a parent taking his/her child to the dentist for a filling from the estimated time (1.5 hours) from national survey data on the average time for dental visit (includes travel and wait time;(21)) and the hourly value of household services, \$14.23(22). The total cost of lost productivity from a parent taking their child to a dentist for a filling was \$21.34. We estimate net-costs (numerator of cost-effectiveness ratio) without productivity losses in a sensitivity analysis.

### **I.C. Analysis**

We estimated the cost effectiveness of SSPs using base-case parameters (Exhibit A6) and with the following parameters:

1. Children served by SSP only have 3 1M eligible for sealants, i.e., one 1M already has a cavity or has not yet erupted.
2. Higher SSP cost that included studies with outlier values.
3. Cost of resources used to restore 1M cavity is the average fee for single-surface fillings paid by Medicaid in the 14 states.
4. There are no productivity losses associated with a dental visit.

We also examined the relative impact of each parameter on our findings when each parameter value varied from 50% to 150% of its

base-case value. We further examined the effect of allowing the first molar cavity attack rate and SSP cost to vary simultaneously.

We performed a probabilistic sensitivity analysis through the use of Monte Carlo simulation. In this analysis, we allowed all parameters to vary simultaneously (Exhibit A6). The distributions for each random variable were determined using the Kolmogorov-Smirnov test. The distribution assigned to each parameter is shown in Exhibit A6.

The probabilistic sensitivity analysis was conducted for a population of 1,000 children, using 1,000 replications in the analysis. The mean and standard deviations were determined for net SSP cost, averted years living with a toothache per child, averted fillings, and cost per averted DALY.

We used two cost-effectiveness thresholds -- cost savings and cost per averted DALYs being less than \$54,639, i.e., 2014 US gross domestic product (GDP) per capita. Although the latter threshold has been criticized, we include it because of its common usage (19).

## References

1. Griffin SO, Jones K, Crespin M. Calculating averted caries attributable to school-based sealant programs with a minimal data set. *J Public Health Dent.* 2014;74(3):202-9.
2. ADA Division of Communications, Journal of the American Dental Association, ADA Council on Scientific Affairs. For the dental patient. Tooth eruption: the permanent teeth. *J Am Dent Assoc.* 2006;137(1):127.
3. Griffin SO. Measuring school sealant program efficiency. The School-Based Health Alliance 2015 meeting; Austin, TX2015.
4. Guide to Community Preventive Services. Preventing dental caries: school-based dental sealant delivery programs 2013 [May 20, 2016]. Available from: [www.thecommunityguide.org/oral/schoolsealants.html](http://www.thecommunityguide.org/oral/schoolsealants.html).
5. Ahovuo-Saloranta A, Forss H, Walsh T, Hiiri A, Nordblad A, Makela M, et al. Sealants for preventing dental decay in the permanent teeth. *Cochrane Database Syst Rev.* 2013;3:CD001830.
6. Quinonez RB, Downs SM, Shugars D, Christensen J, Vann WF, Jr. Assessing cost-effectiveness of sealant placement in children. *J Public Health Dent.* 2005;65(2):82-9.
7. Griffin SO, Griffin PM, Gooch BF, Barker LK. Comparing the costs of three sealant delivery strategies. *J Dent Res.* 2002;81(9):641-5.
8. Dye BA, Tan S, Smith V, Lewis BG, Barker LK, Thornton-Evans G, et al. Trends in oral health status: United States, 1988-1994 and 1999-2004. *Vital Health Stat 11.* 2007(248):1-92.
9. Naavaal S, Barker LK, Griffin SO. The effect of health and dental insurance on US children's dental care utilization for urgent and non-urgent dental problems - 2008. *J Public Health Dent.* 2016.
10. Lewis C, Stout J. Toothache in US children. *Arch Pediatr Adolesc Med.* 2010;164(11):1059-63.
11. Dye BA, Li X, Beltran-Aguilar ED. Selected oral health indicators in the United States, 2005-2008. *NCHS Data Brief.* 2012(96):1-8.
12. Marcenes W, Kassebaum NJ, Bernabe E, Flaxman A, Naghavi M, Lopez A, et al. Global burden of oral conditions in 1990-2010: a systematic analysis. *J Dent Res.* 2013;92(7):592-7.
13. Calderone JJ, Mueller LA. The cost of sealant application in a state dental disease prevention program. *J Public Health Dent.* 1983;43(3):249-54.
14. Garcia AI. Caries incidence and costs of prevention programs. *J Public Health Dent.* 1989;49(5 Spec No):259-71.
15. Klein SP, Bohannon HM, Bell RM, Disney JA, Foch CB, Graves RC. The cost and effectiveness of school-based preventive dental care. *Am J Public Health.* 1985;75(4):382-91.
16. Werner CW, Pereira AC, Eklund SA. Cost-effectiveness study of a school-based sealant program. *ASDC journal of dentistry for children.* 2000;67(2):93-7, 82.
17. Association of State and Territorial Dental Directors. Best practice approach: school-based dental sealant programs. (Originally published 2003.) 2015 [May 20, 2016]. Available from: [www.astdd.org/docs/bpar-selants-update-03-2015.pdf](http://www.astdd.org/docs/bpar-selants-update-03-2015.pdf).
18. Association AD. Dental Fees Results from the 2013 Survey of Dental Fees. Chicago: American Dental Association, 2014.
19. American Dental Association. The 2005-2006 survey of dental services rendered. Chicago: American Dental Association Survey Center, 2007.
20. Riley GF. Administrative and claims records as sources of health care cost data. *Med Care.* 2009;47(7 Suppl 1):S51-5.
21. American Dental Association. 2000 survey of dental practice. Chicago: American Dental Association, 2002.
22. Grosse SD, Krueger KV, Mvundura M. Economic productivity by age and sex: 2007 estimates for the United States. *Med Care.* 2009;47(7 Suppl 1):S94-103.

**Exhibit A1:** Annual 1M attack rate for children with no sealants at baseline screening prior to sealant placement by age: SSPs in 14 states<sup>a</sup>, 2013-2014

| <b>AGE</b>                 | <b>Number screened</b> | <b>Mean</b> | <b>SE</b> | <b>Median</b> |
|----------------------------|------------------------|-------------|-----------|---------------|
| 7                          | 15676                  | 0.089       | 0.009     | 0.089         |
| 8                          | 11450                  | 0.073       | 0.007     | 0.069         |
| 9                          | 5318                   | 0.067       | 0.007     | 0.070         |
| 10                         | 4310                   | 0.065       | 0.008     | 0.061         |
| Weighted across age groups | 36753                  | 0.078       | 0.007     | 0.077         |

<sup>a</sup>Estimated from data collected at baseline screening by school-based sealant programs in Connecticut, Georgia, Iowa, Kansas, Louisiana, Maryland, Minnesota, Mississippi, New York, North Dakota, Rhode Island, South Carolina, West Virginia, and Wisconsin.

**Exhibit A2A:** Number of events for permanent first molar (1M) cavity outcome per child (S=sound; C=cavity).

| <b>Number of 1Ms with cavities</b> |          |          |          |          |
|------------------------------------|----------|----------|----------|----------|
| <b>0</b>                           | <b>1</b> | <b>2</b> | <b>3</b> | <b>4</b> |
| SSSS                               | SCSS     | CCSS     | CCCS     | CCCC     |
|                                    | CSSS     | SCSC     | SCCC     |          |
|                                    | SSSC     | CSSC     | CSCC     |          |
|                                    | SSCS     | SCCS     | CCSC     |          |
|                                    |          | CSCS     |          |          |
|                                    |          | SSCC     |          |          |

**Exhibit A2B:** Cumulative probabilities per child not receiving sealants having 0-4 1M cavities and cumulative increment for children receiving no sealants by year

| <b>Year</b> | <b>Probabilities for number of 1Ms with cavities</b> |       |       |       |       | <b>Increment</b> |
|-------------|------------------------------------------------------|-------|-------|-------|-------|------------------|
|             | 0                                                    | 1     | 2     | 3     | 4     |                  |
| <b>1</b>    | 0.723                                                | 0.245 | 0.031 | 0.002 | 0.000 | 0.312            |
| <b>2</b>    | 0.522                                                | 0.368 | 0.097 | 0.011 | 0.001 | 0.598            |
| <b>3</b>    | 0.377                                                | 0.416 | 0.172 | 0.032 | 0.002 | 0.856            |
| <b>4</b>    | 0.273                                                | 0.419 | 0.241 | 0.062 | 0.006 | 1.086            |

**Exhibit A2C:** Annual probabilities per child not receiving sealants having 0-4 1M cavities and annual caries increment by year

| <b>Year</b>         | <b>Number of DF1M</b> |              |              |              |              | <b>Increment</b> |
|---------------------|-----------------------|--------------|--------------|--------------|--------------|------------------|
|                     | 0                     | 1            | 2            | 3            | 4            |                  |
| <b>1</b>            | 0.723                 | 0.245        | 0.031        | 0.002        | 0.000        | 0.312            |
| <b>2</b>            | 0.522                 | 0.124        | 0.066        | 0.010        | 0.000        | 0.286            |
| <b>3</b>            | 0.377                 | 0.048        | 0.075        | 0.020        | 0.002        | 0.259            |
| <b>4</b>            | 0.273                 | 0.002        | 0.069        | 0.030        | 0.004        | 0.230            |
| <b>Over 4 years</b> |                       | <b>0.419</b> | <b>0.241</b> | <b>0.062</b> | <b>0.006</b> | <b>1.086</b>     |

**Exhibit A3:** Per Child caries outcomes without sealants by year

| <b>Year</b>  | <b>First molar<br/>caries<br/>Increment</b> | <b>First molar<br/>untreated<br/>Increment</b> | <b>First<br/>molar<br/>filling<br/>Increment</b> | <b>Incidence</b> |
|--------------|---------------------------------------------|------------------------------------------------|--------------------------------------------------|------------------|
| <b>1</b>     | 0.312                                       | 0.198                                          | 0.114                                            | 0.277            |
| <b>2</b>     | 0.286                                       | 0.182                                          | 0.302                                            | 0.200            |
| <b>3</b>     | 0.259                                       | 0.164                                          | 0.276                                            | 0.145            |
| <b>4</b>     | 0.230                                       | 0.146                                          | 0.248                                            | 0.105            |
| <b>TOTAL</b> | <b>1.086</b>                                |                                                | <b>0.940</b>                                     | <b>0.727</b>     |



**Exhibit A4:** School Sealant Program cost per child by resource category

| <b>STUDY</b>             | <b>Labor</b>   | <b>Equipment</b> | <b>Supplies</b> | <b>Travel</b> | <b>Other</b>  | <b>Total</b>   |
|--------------------------|----------------|------------------|-----------------|---------------|---------------|----------------|
| Garcia 1                 | \$32.87        | \$1.03           | \$6.17          | \$1.77        | NR            | \$41.84        |
| Garcia 2                 | \$35.30        | \$2.06           | \$5.27          | \$3.33        | NR            | \$45.97        |
| Garcia 3                 | \$62.59        | \$3.00           | \$9.59          | \$0.41        | \$0.19        | \$75.80        |
| Garcia 4                 | \$66.62        | \$3.35           | \$5.82          | \$0.58        | NR            | \$76.37        |
| Garcia 5                 | \$63.31        | \$1.67           | \$8.60          | \$1.89        | \$1.11        | \$76.58        |
| Garcia 6                 | \$77.26        | \$4.16           | \$7.73          | \$0.56        | \$1.07        | \$90.77        |
| Calderone                | \$23.51        | \$3.89           | \$5.35          | \$3.27        | NR            | \$36.00        |
| Klein                    | NR             | NR               | NR              | NR            | NR            | \$116.44       |
| Werner                   | \$149.52       | \$1.27           | \$12.37         | NR            | NR            | \$163.16       |
| <b>Median</b>            | <b>\$62.95</b> | <b>\$2.53</b>    | <b>\$6.95</b>   | <b>\$1.77</b> | <b>\$1.07</b> | <b>\$76.37</b> |
| <b>Mean</b>              | <b>\$63.87</b> | <b>\$2.55</b>    | <b>\$7.61</b>   | <b>\$1.69</b> | <b>\$0.79</b> | <b>\$80.33</b> |
| Without Werner and Klein |                |                  |                 |               |               |                |
| <b>Median</b>            | <b>\$62.59</b> | <b>\$3.00</b>    | <b>\$6.17</b>   | <b>\$1.77</b> | <b>\$1.07</b> | <b>\$75.80</b> |
| <b>Mean</b>              | <b>\$51.64</b> | <b>\$2.74</b>    | <b>\$6.93</b>   | <b>\$1.69</b> | <b>\$0.79</b> | <b>\$63.33</b> |

**Exhibit A5 Cost of posterior fillings**

| <b>Filling type</b>          | <b>Fee (2014 US\$)</b> | <b>% of fillings</b> | <b>Weighted value</b> |
|------------------------------|------------------------|----------------------|-----------------------|
| <b>Amalgam - 1 surface</b>   |                        | <b>15%</b>           |                       |
| <b>Amalgam - 2 surface</b>   |                        | <b>24%</b>           |                       |
| <b>Composite - 1 surface</b> |                        | <b>28%</b>           |                       |
| <b>Composite - 2 surface</b> |                        | <b>32%</b>           |                       |
| <b>TOTAL</b>                 |                        |                      |                       |

**\*We reduced total weighted value by 20% and used this value,**

**Exhibit A6: Parameters Used in Analysis**

| <b>Parameter</b>                                             | <b>Base value (SD)</b> | <b>Distribution in Probabilistic Sn analysis</b> | <b>Data Source</b>                                                                                                                                                                            |
|--------------------------------------------------------------|------------------------|--------------------------------------------------|-----------------------------------------------------------------------------------------------------------------------------------------------------------------------------------------------|
| <b>First molar cavity attack rate</b>                        | 0.078 (0.026)          | Uniform Distribution                             | SSP in 14 states                                                                                                                                                                              |
| <b>Probability new cavity remains untreated</b>              | 0.470 (0.023)          | Uniform Distribution                             | Published analysis of National Health Interview Survey (9)                                                                                                                                    |
| <b>School-sealant effectiveness 1-year</b>                   | 68.5% (11.3%)          | Normal Distribution                              | Community Preventive Services Task Force Review (4); (This review included Cochrane review (5) findings)                                                                                      |
| <b>School-sealant effectiveness 2-year</b>                   | 57.9% (17.8%)          | Normal Distribution                              | (4, 5)                                                                                                                                                                                        |
| <b>School-sealant effectiveness 3-year</b>                   | 40.1% (30.8%)          | Normal Distribution                              | (4, 5)                                                                                                                                                                                        |
| <b>School-sealant effectiveness 4-year</b>                   | 25.8% (16.2%)          | Normal Distribution                              | (4, 5)                                                                                                                                                                                        |
| <b>Probability child with untreated cavity has toothache</b> | 0.721 (0.113)          | Uniform Distribution                             | Published data from National Survey of Children's Health on toothache prevalence and examination data on untreated tooth decay from National Health and Nutrition Examination Survey (10, 11) |
| <b>Loss in health/well-being due to toothache</b>            | 0.012                  | Constant                                         | Global Burden of Disease DALY weight for untreated tooth decay causing pain (12)                                                                                                              |
| <b>School-based sealant program resource costs</b>           | \$63.33 (\$21.46)      | Normal Distribution                              | Community Preventive Services Task Force Economic Review of SSP (4)                                                                                                                           |
| <b>Cost per filling</b>                                      | \$139.18 (\$23.99)     | Uniform Distribution                             | American Dental Association survey on frequency of dental services rendered (19) and cost of service (18)                                                                                     |
| <b>Productivity losses</b>                                   | \$21.34 (\$3.33)       | Normal Distribution                              | American Dental Association Survey Data on average time for dental visit (21) and productivity losses for household work (22)                                                                 |
